# Supplementary material
Source: Springer Nature journal article supplement (http://www.nature.com/msb/journal/v4/n1/extref/msb4100205-s2.pdf)
Supplement: msb4100205-s2.pdf [file msb4100205-s2.pdf]

## Supplementary data 2

### Tables and abbreviations

| <i>Abbreviation</i> | <i>Description</i>                           | <i>Unit</i> |
|---------------------|----------------------------------------------|-------------|
| -                   | age                                          | years       |
| ApoA <sub>1</sub>   | serum apolipoprotein A <sub>1</sub>          | mg/dl       |
| ApoA <sub>2</sub>   | serum apolipoprotein A <sub>2</sub>          | mg/dl       |
| ApoB                | serum apolipoprotein B-100                   | mg/dl       |
| Chol                | serum total cholesterol                      | mmol/l      |
| CPept               | serum C-peptide                              | nmol/l      |
| DBP                 | diastolic blood pressure                     | mmHg        |
| DMDur               | duration of type 1 diabetes                  | years       |
| HbA <sub>1c</sub>   | glycosylated hemoglobin                      | %           |
| HDL <sub>2</sub> C  | serum high-density lipoprotein 2 cholesterol | mmol/l      |
| HDL <sub>3</sub> C  | serum high-density lipoprotein 3 cholesterol | mmol/l      |
| Ins                 | insulin dose                                 | U/kg        |
| SBP                 | systolic blood pressure                      | mmHg        |
| sCreat              | serum creatinine                             | μmol/l      |
| sK                  | serum potassium                              | mmol/l      |
| sNa                 | serum sodium                                 | mmol/l      |
| TG                  | serum triglycerides                          | mmol/l      |
| 24h-uAlb            | 24h-urine albumin excretion                  | mg          |
| 24h-uCreat          | 24h-urine creatinine excretion               | mmol        |
| 24h-uK              | 24h-urine potassium excretion                | mmol        |
| 24h-uNa             | 24h-urine sodium excretion                   | mmol        |
| 24h-uUrea           | 24h-urine urea excretion                     | mmol        |
| Waist               | waist circumference                          | cm          |

**Table 1** Descriptions of clinical and biochemical variables.

#### *Metabolic syndrome*

- waist  $\geq$  102 cm (men),  
waist  $\geq$  88 cm (women)
- triglycerides  $\geq$  1.7 mmol/l
- HDL-cholesterol  $<$  1.0 mmol/l (men),  
HDL-cholesterol  $<$  1.3 mmol/l (women)
- blood pressure  $\geq$  130/85 mmHg (either systolic or diastolic suffices)
- fasting glucose positive for all type 1 diabetic patients

**Table 2** Clinical criteria for the diagnosis of the metabolic syndrome. The five points are based on the NCEP ATP III recommendations, except that hyperglycemia was considered positive by default. Furthermore, the data on lipid lowering or anti-hypertensive treatment was excluded since here we are primarily interested in the current metabolic state, with the effect of medications reflected in the biochemistry. HDL-cholesterol was obtained by adding HDL<sub>2</sub>C and HDL<sub>3</sub>C.

|                    | <b>A</b> $n = 75$ |                   | <b>B</b> $n = 115$ |                   | <b>C</b> $n = 89$ |                   | <b>D</b> $n = 91$ |                   | <b>E</b> $n = 119$ |                   | <b>F</b> $n = 124$ |                   | ALL $n = 613$ |                   |
|--------------------|-------------------|-------------------|--------------------|-------------------|-------------------|-------------------|-------------------|-------------------|--------------------|-------------------|--------------------|-------------------|---------------|-------------------|
|                    | $x_{50}$          | $x_{16} - x_{84}$ | $x_{50}$           | $x_{16} - x_{84}$ | $x_{50}$          | $x_{16} - x_{84}$ | $x_{50}$          | $x_{16} - x_{84}$ | $x_{50}$           | $x_{16} - x_{84}$ | $x_{50}$           | $x_{16} - x_{84}$ | $x_{50}$      | $x_{16} - x_{84}$ |
| Age                | 37                | 29 - 51           | 41                 | 30 - 51           | 40                | 28 - 50           | 42                | 28 - 51           | 37                 | 28 - 51           | 39                 | 27 - 53           | 39            | 28 - 51           |
| DMDur              | 25                | 18 - 33           | 28                 | 18 - 38           | 27                | 16 - 37           | 25                | 17 - 37           | 27                 | 18 - 35           | 24                 | 17 - 36           | 26            | 17 - 36           |
| DBP                | 83                | 71 - 93           | 80                 | 70 - 92           | 81                | 70 - 91           | 82                | 72 - 90           | 79                 | 70 - 86           | 80                 | 70 - 89           | 80            | 70 - 90           |
| SBP                | 139               | 120 - 158         | 140                | 120 - 161         | 136               | 121 - 151         | 139               | 120 - 160         | 130                | 120 - 150         | 132                | 120 - 150         | 136           | 120 - 155         |
| Waist              | 94                | 79 - 108          | 86                 | 75 - 98           | 87                | 77 - 97           | 86                | 75 - 96           | 81                 | 70 - 95           | 83                 | 73 - 96           | 85            | 74 - 99           |
| Ins                | 0.75              | 0.53 - 1.01       | 0.67               | 0.47 - 0.89       | 0.70              | 0.53 - 0.93       | 0.70              | 0.51 - 0.91       | 0.69               | 0.48 - 0.90       | 0.62               | 0.45 - 0.86       | 0.68          | 0.49 - 0.92       |
| CPept              | 0                 | 0 - 0.01          | 0                  | 0 - 0.02          | 0                 | 0 - 0             | 0                 | 0 - 0.01          | 0                  | 0 - 0.02          | 0                  | 0 - 0.01          | 0             | 0 - 0.01          |
| ApoA <sub>1</sub>  | 133               | 118 - 165         | 133                | 112 - 157         | 137               | 116 - 161         | 147               | 123 - 178         | 135                | 118 - 152         | 142                | 122 - 163         | 137           | 118 - 162         |
| ApoB               | 114               | 93 - 134          | 95                 | 69 - 116          | 100               | 84 - 115          | 102               | 78 - 133          | 79                 | 63 - 97           | 86                 | 69 - 105          | 94            | 72 - 116          |
| HbA <sub>1c</sub>  | 9.2               | 7.8 - 11.3        | 8.6                | 7.3 - 10.4        | 8.9               | 7.3 - 9.9         | 8.3               | 7.2 - 9.3         | 8.2                | 7.3 - 9.3         | 8.2                | 6.9 - 9.1         | 8.5           | 7.2 - 9.8         |
| HDL <sub>2</sub> C | 0.34              | 0.23 - 0.65       | 0.45               | 0.26 - 0.73       | 0.52              | 0.29 - 0.76       | 0.60              | 0.27 - 0.86       | 0.54               | 0.33 - 0.74       | 0.55               | 0.34 - 0.82       | 0.51          | 0.29 - 0.77       |
| HDL <sub>3</sub> C | 0.63              | 0.49 - 0.79       | 0.65               | 0.52 - 0.86       | 0.67              | 0.57 - 0.80       | 0.72              | 0.57 - 0.89       | 0.71               | 0.56 - 0.89       | 0.75               | 0.61 - 0.94       | 0.69          | 0.56 - 0.88       |
| Chol               | 5.84              | 4.74 - 6.91       | 4.94               | 3.79 - 5.72       | 5.16              | 4.35 - 5.99       | 5.65              | 4.76 - 6.5        | 4.49               | 3.76 - 5.22       | 4.91               | 4.03 - 5.60       | 5.05          | 4.11 - 6.01       |
| TG                 | 2.82              | 2.23 - 3.9        | 1.21               | 0.78 - 1.79       | 1.47              | 1.17 - 1.94       | 1.26              | 0.83 - 1.79       | 0.84               | 0.62 - 1.09       | 0.84               | 0.68 - 1.07       | 1.12          | 0.72 - 2.08       |
| sK                 | 4.5               | 4.0 - 5.1         | 4.4                | 4.2 - 4.9         | 4.4               | 4.0 - 4.8         | 4.3               | 3.9 - 4.8         | 4.3                | 4.0 - 4.7         | 4.3                | 3.9 - 4.7         | 4.4           | 4.0 - 4.8         |
| sNa                | 139               | 135 - 143         | 139                | 136 - 144         | 140               | 134 - 143         | 141               | 137 - 145         | 140                | 136 - 143         | 141                | 137 - 144         | 140           | 136 - 144         |
| sCreat             | 116               | 79 - 271          | 96                 | 78 - 158          | 96                | 79 - 135          | 92                | 75 - 123          | 87                 | 73 - 106          | 88                 | 77 - 107          | 92            | 77 - 135          |
| 24h-uAlb           | 356               | 11 - 1996         | 199                | 7 - 1600          | 42                | 6 - 528           | 38                | 7 - 364           | 16                 | 6 - 210           | 13                 | 6 - 84            | 37            | 7 - 734           |
| 24h-uK             | 52                | 37 - 79           | 50                 | 37 - 75           | 56                | 40 - 81           | 52                | 35 - 73           | 52                 | 32 - 76           | 53                 | 36 - 88           | 53            | 37 - 79           |
| 24h-uNa            | 89                | 58 - 141          | 96                 | 56 - 138          | 102               | 68 - 150          | 101               | 59 - 141          | 85                 | 49 - 143          | 98                 | 58 - 156          | 96            | 58 - 143          |
| 24h-uCreat         | 11.0              | 8.0 - 15.1        | 11.3               | 8.6 - 15.4        | 12.3              | 9.1 - 16.2        | 12.0              | 8.1 - 17.1        | 11.5               | 8.1 - 15.8        | 12.1               | 8.7 - 15.8        | 11.7          | 8.5 - 16.0        |
| 24h-uUrea          | 234               | 177 - 379         | 245                | 153 - 372         | 261               | 181 - 420         | 246               | 138 - 406         | 258                | 150 - 422         | 265                | 168 - 412         | 249           | 160 - 412         |

■  $p < 0.0001$  □  $p < 0.01$

**Table 3** Clinical characteristics of the SOM map districts. The patient groupings were obtained from the <sup>1</sup>H NMR spectra, but all the above data are measured by non-NMR methods. In the table, columns marked by  $x_{50}$  contain the median values (50th percentile) whereas the  $x_{16}$  and  $x_{84}$  represent the 16th and 84th percentiles, respectively. For normally distributed values this corresponds to  $\pm$  one standard deviation.

P-values were calculated for each variable in each grouping by comparing the group-specific distributions to the combined set of the other five groups, that is, we tested each variable whether it is distinctive for a given grouping. The Kolmogorov-Smirnov test for two empirical distributions was used to compute the p-values.

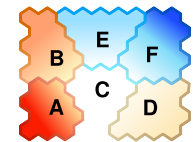

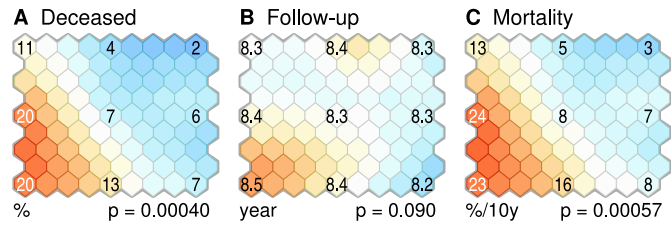

**Figure 1** Number of deaths, follow-up period and mortality. **(A)** Estimated proportions of deceased patients on the self-organizing map from the  $613 \times 2$   $^1\text{H}$  NMR spectra of serum. **(B)** Estimated follow-up periods in different map regions. Only patients that were alive (91%) were used to avoid bias from end-points. **(C)** 10-year mortality estimates based on the two previous colorings.
